# Supplementary material for: New Basal Iguanodonts from the Cedar Mountain Formation of Utah and the Evolution of Thumb-Spiked Dinosaurs
Source: PLoS One. 2010 Nov 22;5(11):e14075. doi: 10.1371/journal.pone.0014075 (PMC2989904; doi:10.1371/journal.pone.0014075)
Supplement: File S2 — Data matrix used in the phylogenetic analysis of Iguanodontia. (0.12 MB XLS) [file pone.0014075.s002.xls]

## Sheet: Sheet1
Character	0	1	2	3	4	5	6		7	8	9	10	11	12	13	14	15	16	17	18	19	20	21	22	23		24	25	26	27		28	29	30	31	32	33	34	35	36	37	38		39	40	41	42	43	44
Taxon	PD1	PD2	PD3	PD4	PD5	PD6	PD7		DT1	DT2	DT3	DT4	DT5	DT6	DT7	DT8	DT9	DT10	DT11	DT12	DT13	DT14	DT15	DT16	DT17		SU1	SU2	SU3	ANG1		PM1	PM2	PM3	PM4	PM5	PM6	PM7	PM8	PM9	PM10	NA1		MX1	MX2	MX3	MX4	MX5	MX6
Lesothosaurus diagnosticus	0	0	0	0	0	?	0		0	0	0	0	0	0	0	0	0	0	0	0	0	0	0	?	?		0	0	0	0		0	0	0	0	0	0	?	?	0	?	0		0	0	0	0	0	0
Hypsilophodon foxii	0	0	0	0	0	?	0		0	0	0	0	0	0	0	0	0	0	0	0	0	0	0	?	?		0	1	0	0		0	0	0	0	0	0	?	0	0	0	0		0	0	0	0	0	0
Rhabdodon sp.	?	?	?	?	?	?	?		0	0	0	0	0	0	0	1	1	0	0	0	0	0	0	?	?		0	?	1	0		?	?	?	?	?	?	?	?	?	?	?		?	?	?	?	?	?
Zalmoxes robustus	1	0	1	0	0	?	0		0	0	0	0	1	0	0	1	1	2	0	0	0	0	0	?	?		0	1	1	0		0	1	1	0	0	0	?	?	0	0	0		0	0	0	0	0	?
Zalmoxes shqiperorum	1	?	?	0	0	?	0		0	0	0	2	1	1	0	1	1	2	0	0	0	0	0	?	?		?	1	?	?		?	?	?	?	?	?	?	?	?	?	?		?	?	?	?	?	?
Muttaburrasaurus langdoni	?	?	?	?	?	?	?		?	?	?	?	?	?	?	?	?	?	?	?	?	?	?	?	?		?	1	?	?		?	?	?	?	?	?	?	?	?	?	?		?	0	0	?	?	1
Tenontosaurus dossi	1	0	0	0	1	0	1		?	?	0	?	0	?	?	?	1	0	0	0	?	0	0	?	?		0	1	0	0		1	0	1	1	0	0	?	0	1	0	1		0	0	0	0	0	0
Tenontosaurus tilletti	1	?	0	0	1	0	1		0	0	0	0	0	0	0	1	1	0	0	0	0	0	0	?	?		0	1	0	0		1	1	1	1	0	0	?	?	?	?	1		0	0	0	?	?	0
Callovosaurus leedsi	?	?	?	?	?	?	?		?	?	?	?	?	?	?	?	?	?	?	?	?	?	?	?	?		?	?	?	?		?	?	?	?	?	?	?	?	?	?	?		?	?	?	?	?	?
"Camptosaurus" valdensis	?	?	?	?	?	?	?		?	?	?	?	?	?	?	?	?	?	?	?	?	?	?	?	?		?	?	?	?		?	?	?	?	?	?	?	?	?	?	?		?	?	?	?	?	?
Dryosaurus altus	1	0	1	?	1	?	?		?	?	0	0	0	0	0	1	1	0	0	0	0	0	0	?	?		0	1	0	0		1	1	1	1	0	0	?	0	1	0	1		0	0	0	0	0	0
Dysalotosaurus lettowvorbecki	1	0	1	1	1	0	1		0	1	0	0	0	0	0	1	1	0	0	0	0	0	0	?	?		0	?	0	0		1	1	?	?	0	0	?	?	?	?	?		0	0	0	0	0	0
Kangnasaurus coetzeei	?	?	?	?	?	?	?		?	?	?	?	?	?	?	?	?	?	?	?	?	?	?	?	?		?	?	?	?		?	?	?	?	?	?	?	?	?	?	?		?	?	?	?	?	?
Elrhazosaurus nigeriensis	?	?	?	?	?	?	?		?	?	?	?	?	?	?	?	?	?	?	?	?	?	?	?	?		?	?	?	?		?	?	?	?	?	?	?	?	?	?	?		?	?	?	?	?	?
Valdosaurus canaliculatus	?	?	?	?	?	?	?		?	?	?	?	?	?	?	?	?	?	?	?	?	?	?	?	?		?	?	?	?		?	?	?	?	?	?	?	?	?	?	?		?	?	?	?	?	?
"Camptosaurus" aphanoecetes	?	?	?	?	?	?	?		?	?	?	?	0	?	0	1	1	0	?	?	0	0	0	?	?		?	?	?	?		?	?	?	?	?	?	?	?	?	?	?		?	?	?	?	?	?
Camptosaurus dispar	1	0	1	1	1	0	1		0	1	0	1	0	0	0	1	1	0	0	0	0	0	0	?	?		?	?	?	?		1	1	1	1	0	1	0	?	?	?	?		0	0	0	0	0	0
Draconyx loureiroi	?	?	?	?	?	?	?		?	?	?	?	?	?	?	?	?	?	?	?	?	?	?	?	?		?	?	?	?		?	?	?	?	?	?	?	?	?	?	?		?	?	?	?	?	?
Cumnoria prestwichii	?	?	?	?	?	?	?		?	?	?	1	0	0	0	1	?	?	?	0	0	?	?	?	?		?	1	0	0		1	?	1	?	0	?	?	?	?	?	?		0	?	0	0	0	0
Owenodon hoggii	?	?	?	?	?	?	?		?	1	0	1	2	0	0	1	0	0	0	0	0	0	0	?	?		?	?	?	?		?	?	?	?	?	?	?	?	?	?	?		?	?	?	?	?	?
NHMUK R8676	?	?	?	?	?	?	?		?	?	?	?	?	?	?	?	?	?	?	?	?	?	?	?	?		?	?	?	?		?	?	?	?	?	?	?	?	?	?	?		?	?	?	?	?	?
Iguanacolossus fortis	?	?	?	1	?	?	?		?	?	?	?	?	?	?	?	?	?	?	?	?	?	?	?	?		?	?	?	?		?	?	?	?	?	?	?	?	?	?	?		?	?	1	0	?	1
Hippodraco scutodens	?	?	?	?	?	?	?		?	?	?	1	0	0	?	?	1	1	0	0	0	?	?	?	?		0	?	0	0		?	?	?	?	?	?	?	0	1	1	?		?	?	0	0	?	1
Theiophytalia kerri	?	?	?	?	?	?	?		?	?	?	?	?	?	?	?	?	?	0	0	0	0	0	?	?		0	1	0	0		1	1	1	1	0	1	0	0	1	1	1		0	1	?	?	?	1
Cedrorestes crichtoni	?	?	?	?	?	?	?		?	?	?	?	?	?	?	?	?	?	?	?	?	?	?	?	?		?	?	?	?		?	?	?	?	?	?	?	?	?	?	?		?	?	?	?	?	?
Planicoxa venenica	?	?	?	?	?	?	?		?	?	?	?	?	?	?	?	?	?	?	?	?	?	?	?	?		?	?	?	?		?	?	?	?	?	?	?	?	?	?	?		?	?	?	?	?	?
"Camptosaurus" depressus	?	?	?	?	?	?	?		?	?	?	?	?	?	?	?	?	?	?	?	?	?	?	?	?		?	?	?	?		?	?	?	?	?	?	?	?	?	?	?		?	?	?	?	?	?
Dakotadon lakotaensis	1	0	1	?	1	0	1		0	1	0	1	0	?	0	?	1	0	?	?	?	?	?	?	?		?	?	?	?		1	1	1	1	0	1	1	0	1	1	1		0	1	1	0	0	1
Lurdusaurus arenatus	1	?	?	?	?	?	?		?	?	?	?	?	?	?	?	?	?	?	?	?	?	?	?	?		0	1	0	0		1	?	?	?	0	?	?	?	?	?	?		?	?	?	?	?	?
Barilium dawsoni	?	?	?	?	?	?	?		0	1	?	1	0	0	0	?	1	1	0	?	?	?	?	?	?		?	?	?	?		?	?	?	?	?	?	?	?	?	?	?		?	?	?	?	?	?
Hypselospinus fittoni	?	?	?	?	?	?	?		?	?	?	?	?	?	?	?	?	?	?	?	?	?	?	?	?		?	?	?	?		?	?	?	?	?	?	?	?	?	?	?		?	?	?	?	?	?
NHMUK R1831	?	?	?	?	?	?	?		0	1	1	1	0	0	0	2	0	0	0	0	0	?	?	?	?		?	?	?	?		?	?	?	?	?	?	?	?	?	?	?		?	?	?	?	?	?
Lanzhousaurus magnidens	?	?	?	?	?	?	?		0	1	0	1	0	0	0	2	1	0	0	0	0	0	0	?	?		0	1	0	0		?	?	?	?	?	?	?	?	?	?	?		?	?	?	?	?	?
Fukuisaurus tetoriensis	1	0	1	0	1	?	1		0	1	0	?	0	?	?	3	1	2	0	?	0	1	1	0	0		0	1	2	0		1	1	1	1	0	0	?	?	?	?	?		0	?	1	?	?	1
Kukufeldia tilgatensis	?	?	?	?	?	?	?		0	1	1	1	0	0	0	?	1	0	0	0	?	1	1	0	0		?	?	?	?		?	?	?	?	?	?	?	?	?	?	?		?	?	?	?	?	?
Iguanodon bernissartensis	1	1	1	1	1	0	1		0	1	1	1	0	0	0	3	1	1	0	1	0	1	1	0	0		0	?	0	0		1	1	1	1	0	1	1	0	1	1	1		?	1	1	?	?	1
Mantellisaurus atherfieldensis	1	1	1	1	1	0	1		0	1	1	1	0	0	0	3	1	1	1	1	0	1	1	0	0		0	?	0	0		1	1	1	1	0	1	1	0	1	1	1		1	1	1	1	0	1
Ouranosaurus nigeriensis	2	1	?	1	1	0	1		1	1	1	1	0	0	0	3	2	0	1	1	0	0	?	?	?		0	1	0	0		1	1	1	2	0	1	1	1	1	0	1		?	?	1	1	2	1
Altirhinus kurzanovi	1	1	1	0	1	1	1		?	1	1	?	0	?	0	3	1	1	0	1	1	1	1	1	0		0	1	0	0		1	1	1	1	0	?	?	1	1	0	1		1	1	1	?	?	1
Jinzhousaurus yangi	1	?	0	?	1	?	1		?	1	1	?	0	?	?	?	1	0	1	1	?	1	1	?	?		0	?	0	0		1	?	1	?	?	?	?	1	1	1	1		?	1	0	?	?	1
Jintasaurus meniscus	?	?	?	?	?	?	?		?	?	?	?	?	?	?	?	?	?	?	?	?	?	?	?	?		?	?	?	?		?	?	?	?	?	?	?	?	?	?	?		?	?	?	?	?	?
Equijubus normani	?	?	1	1	1	1	1		0	1	1	?	0	?	?	?	1	1	1	1	?	1	1	1	0		0	2	2	0		1	1	1	1	0	1	1	0	1	1	1		1	1	1	?	?	1
Penelopognathus weishampeli	?	?	?	?	?	?	?		0	1	0	1	0	0	1	3	1	0	1	1	1	1	1	0	0		?	?	?	?		?	?	?	?	?	?	?	?	?	?	?		?	?	?	?	?	?
Probactrosaurus mazongshanensis	?	?	?	?	?	?	?		?	?	?	?	?	?	?	?	?	?	?	?	?	?	?	?	?		?	?	?	?		?	?	?	?	?	?	?	?	?	?	?		?	?	?	?	?	?
Probactrosaurus gobiensis	1	1	?	1	1	1	1		0	1	1	1	0	0	1	3	1	1	1	?	1	1	1	1	0		0	?	2	0		1	?	1	1	0	?	?	1	?	?	1		?	?	1	?	?	1
Eolambia caroljonesa	1	1	?	1	1	1	1		0	1	1	1	0	0	1	3	2	1	1	1	1	1	1	0	0		0	2	2	0		1	1	1	1	0	1	1	1	?	?	1		1	1	1	1	0	1
Jeyawati rugoculus	1	?	?	?	?	?	?		0	1	1	1	0	0	1	3	1	1	1	1	1	1	1	0	0		?	?	?	?		?	?	1	?	?	?	?	?	?	?	?		?	?	0	2	1	1
Protohadros byrdi	1	1	1	1	1	?	1		1	1	1	1	0	0	1	3	2	1	1	1	1	1	1	0	0		0	2	2	0		1	1	1	1	0	1	1	?	?	?	1		1	1	0	1	0	1
Shuangmiaosaurus gilmorei	?	?	?	?	?	?	?		1	1	1	2	0	1	1	3	1	1	0	1	1	?	1	1	?		?	?	?	?		?	?	?	?	?	?	?	1	1	?	?		1	1	1	?	?	1
Nanyangosaurus zhugeii	?	?	?	?	?	?	?		?	?	?	?	?	?	?	?	?	?	?	?	?	?	?	?	?		?	?	?	?		?	?	?	?	?	?	?	?	?	?	?		?	?	?	?	?	?
Bactrosaurus johnsoni	1	1	1	1	1	2	1		0	1	1	2	0	1	1	3	1	1	0	1	1	1	1	1	0		1	?	2	0		1	1	1	2	0	1	2	?	?	?	1		1	1	0	1	0	1
Gilmoreosaurus mongoliensis	1	1	?	1	1	?	1		0	1	?	?	0	?	?	?	1	1	?	?	?	?	?	?	?		?	?	?	?		?	?	?	?	?	?	?	?	?	?	?		1	?	0	2	2	1
Levnesovia transoxiana	1	?	?	1	1	?	1		0	1	1	0	0	0	1	?	1	1	?	1	?	?	?	?	?		1	?	?	0		?	?	?	?	?	?	?	?	?	?	?		?	?	0	?	?	1
Tanius sinensis	?	?	?	?	?	?	?		?	?	?	?	?	?	?	?	?	?	?	?	?	?	?	?	?		?	?	?	?		?	?	?	?	?	?	?	?	?	?	?		?	?	?	?	?	?
Tethyshadros insularis	?	?	1	?	1	1	1		?	?	0	?	0	?	?	?	1	1	0	?	?	2	1	?	?		1	2	?	1		1	1	1	2	0	1	3	1	1	1	1		?	0	0	?	?	1
Telmatosaurus transsylvanicus	?	?	?	?	?	?	?		1	1	1	2	0	1	1	3	1	1	1	1	1	2	1	1	0		1	?	2	1		1	1	1	2	0	1	2	?	?	?	1		1	1	0	1	2	1
Claosaurus agilis	?	?	?	?	?	?	?		?	?	?	?	?	?	1	?	?	?	?	?	?	?	?	?	?		?	?	?	?		?	?	?	?	?	?	?	?	?	?	?		?	?	?	?	?	1
Lophorhothon atopus	?	?	?	?	?	?	?		?	?	?	?	?	?	?	?	?	?	?	?	?	?	?	?	?		?	?	?	?		?	?	?	?	?	?	?	?	1	1	?		?	?	0	?	?	?
Hadrosaurus foulkii	?	?	?	?	?	?	?		?	?	?	?	?	?	?	?	?	?	?	?	?	?	?	?	?		?	?	?	?		?	?	?	?	?	?	?	?	?	?	?		?	?	?	?	?	?
Edmontosaurus annectens	2	1	1	1	1	2	1		1	1	1	2	0	1	1	4	1	1	1	1	1	2	1	1	1		1	2	2	1		1	1	1	2	1	1	2	1	1	1	1		1	1	0	2	2	1
Corythosaurus casuarius	2	1	1	1	1	2	1		?	1	1	2	0	1	1	4	1	1	1	1	1	2	1	1	1		1	2	2	1		1	1	1	2	1	1	2	1	1	1	1		?	1	0	?	?	1
[truncated: 86 more columns]
