# Supplementary material for: New Basal Iguanodonts from the Cedar Mountain Formation of Utah and the Evolution of Thumb-Spiked Dinosaurs
Source: PLoS One. 2010 Nov 22;5(11):e14075. doi: 10.1371/journal.pone.0014075 (PMC2989904; doi:10.1371/journal.pone.0014075)
Supplement: File S3 — List of the fossil specimens examined firsthand and references used to code the 61 taxa in the phylogenetic analysis of Iguanodontia. (0.03 MB XLS) [file pone.0014075.s003.xls]

## Sheet: Sheet1
Taxa, Specimens, and References Used in the Phylogenetic Analysis of Basal Iguanodonts
Taxa	Specimens Examined Firsthand	Supplemental References Used
Lesothosaurus diagnosticus	NHMUK RUB17 (syntype), RUB23 (syntype), R11956	Sereno, 1991
Hypsilophodon foxii	NHMUK R192, R193, R195, R196, R197 (holotype), R199, R2466, R2477, R5830	Galton, 1974
Rhabdodon sp.	MNHN material from La Boucharde	Allain and Pereda Suberbiola, 2003
Zalmoxes robustus	NHMUK R3390, R3391, R3392 (holotype), R3393, R3394, R3395, R3396, R3398, R3400, R3401, R3402, R3405, R3408, R3409, R3410, R3809, R3810, R3812, R3813, R3814, R3832, R3834, R4901, R4908, R4909, R4912, R4972, R11115	Weishampel et al., 2003
Zalmoxes shqiperorum	NHMUK R4900 (holotype), R5491 (cast of complete left dentary)	Weishampel et al., 2003; Godefroit et al., 2009
Tenontosaurus dossi		Winkler et al., 1997
Tenontosaurus tilletti	AMNH 3034, 3040 (holotype), 3043; YPM 5456, 5458, 5459, 5460, 5461, 5466, 5471, 5472, PU16514, BB #1 material	Ostrom, 1970; Forster, 1990
Muttaburrasaurus langdoni	NHMUK R9604 (cast of parts of holotype QM F6140)	Bartholomai and Molnar, 1981; Molnar, 1996
Callovosaurus leedsi	NHMUK R1993 (holotype)	Ruiz-Omeñaca et al., 2007
Dryosaurus altus	YPM 1876 (holotype), 1884, 57180; CM 1949, 3392, 11340, 21876, 41687; AMNH 834; USNM 5826	Galton, 1981, 1983
Dysalotosaurus lettowvorbecki	NHMUK R6861, R12277, R12278	Janensch, 1955; Galton, 1981, 1983
Kangnasaurus coetzeei		Cooper, 1985
"Camptosaurus" valdensis	NHMUK R167 (holotype)	Barrett, 1996
Valdosaurus canaliculatus	NHMUK R184 (syntype), R185 (syntype)	Galton and Taquet, 1982; Galton, 2009
Elrhazosaurus nigeriensis	MNHN GDF 332 (holotype), GDF 335	Galton and Taquet, 1982; Galton, 2009
"Camptosaurus" aphanoecetes	CM 11337 (holotype), 15780 (paratype), 21723, 21725, 33974, 41686, 41689 (paratype)	Carpenter and Wilson, 2008
Camptosaurus dispar	YPM 1856A, 1877 (holotype), 1878 (paratype), 1880, 1886, 1888, 7334, 7416, 7417, 7419, 7426, 8611, 8619, 8620, 8622, PU14553; USNM 2210, 4277, 4281, 4282, 4697, 5473, 5818, 5819, 5821, 5825, 5954, 5955, 5959, 5961, 5996, 5997, 5998, 7421, 7631	Gilmore, 1909
Draconyx loureiroi		Mateus and Antunes, 2001
Owenodon hoggii	NHMUK R2998 (holotype)	Norman and Barrett, 2002; Galton, 2009
NHMUK R8676 iguanodont	NHMUK R8676 (on loan to HERM)	Galton, 2009
Cumnoria prestwichii	OXFUM J.3303 (holotype)	Galton and Powell, 1980
Cedrorestes crichtoni	DMNH 47994 (holotype)	Gilpin et al., 2007; this paper
"Camptosaurus" depressus	USNM 4753 (holotype)	Gilmore, 1909
Planicoxa venenica	DMNH 40911, 40914, 40917, 40918, 42504 (holotype), 42505 (rest are paratypes)	DiCroce and Carpenter, 2001
Iguanacolossus fortis	UMNH VP 20205 (holotype)	This paper
Hippodraco scutodens	UMNH VP 20208 (holotype)	This paper
Theiophytalia kerri	YPM 1887 (holotype)	Brill and Carpenter, 2007
Lanzhousaurus magnidens		You et al., 2005
Lurdusaurus arenatus	MNHN GDF 1700 (holotype)	Taquet and Russell, 1999
Fukuisaurus tetoriensis		Kobayashi and Azuma, 2003
Dakotadon lakotaensis	SDSM 8656 (holotype)	Weishampel and Bjork, 1989
Barilium dawsoni	NHMUK R798, R799, R802, R4771 (syntypes), R1834, R3788, R4743, R4746	Lydekker, 1888; Norman, 2010
Hypselospinus fittoni	NHMUK R1635 (holotype), R1148, R1629, R1632 (syntypes of "I. hollingtoniensis"), R604, R811 (referred to "I. hollingtoniensis")	Lydekker, 1889; Norman, 2010
Iguanodon bernissartensis	IRSNB 1534 (lectotype), 1536, 1561, 1639; NHMUK R2502, R2503, R2506, R2507 (syntypes of "I. seelyi"); MIWG 1997.55	Norman, 1980
Mantellisaurus atherfieldensis	IRSNB 1551; MIWG 6344; NHMUK R5764 (holotype), R3741, R11521	Hooley, 1925; Norman, 1986
Kukufeldia tilgatensis	NHMUK 28660 (holotype)	McDonald et al., 2010a
NHMUK R1831 iguanodont	NHMUK R1831, R1832, R1833	Norman, 2010
Ouranosaurus nigeriensis	Cast of holotype MNHN GDF 300	Taquet, 1976
Altirhinus kurzanovi		Norman, 1998
Jinzhousaurus yangi		Barrett et al., 2009
Equijubus normani	IVPP V 12534 (holotype)	You et al., 2003b
Jintasaurus meniscus		You and Li, 2009
Penelopognathus weishampeli		Godefroit et al., 2005
Probactrosaurus gobiensis	IRSNB material; MSM cast of PIN specimens	Norman, 2002
Probactrosaurus mazongshanensis		Lü, 1997
Eolambia caroljonesa	CEUM 9758 (holotype), 5212 (paratype), additional CEUM specimens from Eolambia #2 bonebed and Willow Springs 8 bonebed	Kirkland, 1998; Head, 2001; McDonald et al., in prep.
Protohadros byrdi	SMU 74582 (holotype)	Head, 1998
Jeyawati rugoculus	MSM P4166 (holotype)	McDonald et al., 2010b
Shuangmiaosaurus gilmorei		You et al., 2003a
Nanyangosaurus zhugeii		Xu et al., 2000
Bactrosaurus johnsoni	AMNH 6365, 6366, 6372, 6386, 6396, 6553 (holotype), 6575, 6577; IRSNB casts; YPM 5767 (cast of PIN 2549/1)	Gilmore, 1933; Godefroit et al., 1998
Gilmoreosaurus mongoliensis	AMNH 6369, 6551 (holotype)	Gilmore, 1933
Levnesovia transoxiana		Sues and Averianov, 2009
Tanius sinensis		Wiman, 1929
Telmatosaurus transsylvanicus	NHMUK R3386 (holotype)	Weishampel et al., 1993; Dalla Vecchia, 2009a
Tethyshadros insularis		Dalla Vecchia, 2009b
Claosaurus agilis	YPM 1190 (holotype)	Carpenter et al., 1995
Lophorhothon atopus		Langston, 1960
Hadrosaurus foulkii	ANSP 9201, 9202, 9203, 9204, 10005 (syntypes)	Prieto-Márquez et al., 2006a
Edmontosaurus annectens	USNM 2413, 3814, 4737, 4807, 4809, 5839, 22102; YPM 2182; DMNH 1493; AMNH 427, 5046, 5879	Marsh, 1893
Corythosaurus casuarius	AMNH 5240 (holotype), 5338 (paratype), 5359, 5433; CM 9461; USNM 15493	Brown, 1914, 1916; Ostrom, 1961
